# Supplementary material for: Population structure of Pacific green turtles: a new perspective from microsatellite DNA variation
Source: Frontiers journal article supplement (doi:10.3389/fmars.2023.1116941), 2023-07-03
Supplement: Image_2.pdf [file Image_2.pdf]

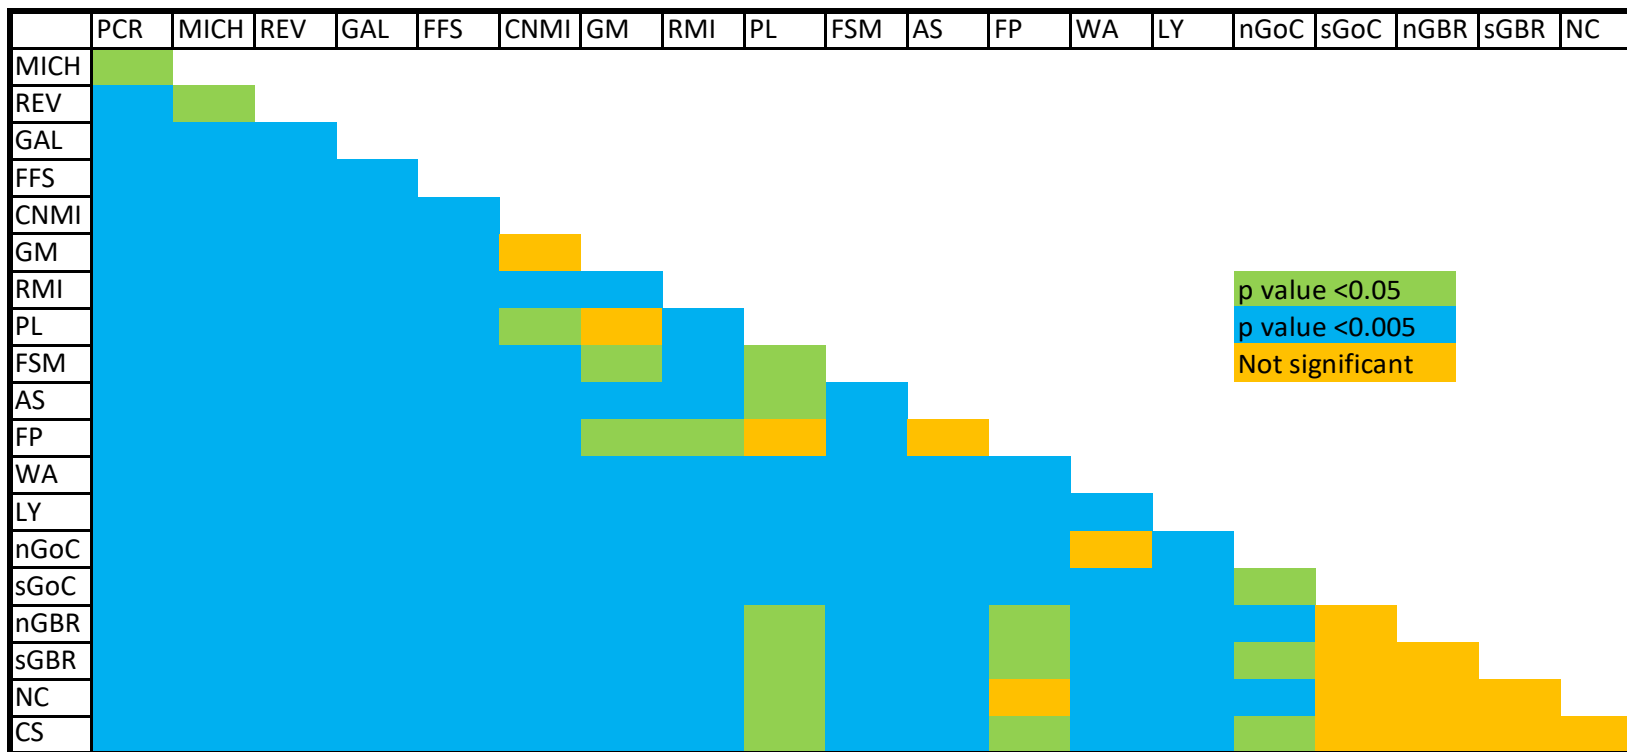

Supplementary Figure 2. Results of pairwise FST tests (6 loci) (Blue,  $p < 0.005$ ; green,  $p < 0.05$ ; orange,  $p > 0.05$ ) PCR = Guanacaste, Costa Rica; MICH = Playa Colola, Michoacán, Mexico; REV = Islas Revillagigedo, Mexico; GAL = Galapagos Islands, Ecuador; FFS = French Frigate Shoals, Hawaii, USA; CNMI = Commonwealth of the Northern Mariana Islands, USA; GM = Guam, USA; RMI = Republic of the Marshall Islands; PL = Palau; WAN = Wan-an Island, Taiwan; LY = Lanyu Island, Taiwan; FSM = Federated States of Micronesia; AS = American Samoa, USA; FP = French Polynesia; nGoC = northern Gulf of Carpentaria, Northern Territory, Australia; sGoC = southern Gulf of Carpentaria, Queensland Australia; CS = Coral Sea Islands, Australia; sGBR = Southern Great Barrier Reef, Australia; nGBR = Northern Great Barrier Reef, Australia; NC = New Caledonia
